# Supplementary material for: Drug Efflux by Breast Cancer Resistance Protein Is a Mechanism of Resistance to the Benzimidazole Insulin-Like Growth Factor Receptor/Insulin Receptor Inhibitor, BMS-536924
Source: Oxford University Press journal article supplement (doi:10.1158/1535-7163.mct-10-0438), 2011-01-01
Supplement: 15357163mct100438-sup-0438_sup_fig_legends.pdf [file 15357163mct100438-sup-0438_sup_fig_legends.pdf]

## **Supplemental Data**

**Haluska et al**

**Running Title:** BMS-536934 efflux by BCRP

### **Supplemental Figure 1.**

Graphical representation of changes in ABC transporter family members represented in microarray experiments in MCF-7R4 cells compared to parental MCF-7 cells for genes with MCF-7R4/MCF-7 expression ratio  $<1$ .

### **Supplemental Figure 2.**

A) ABC transporters that are significantly differential expressed between MCF7-924R vs. MCF-7 parental cells by DNA microarray analyses.

B) Fold changes of ABC transporter family members comparing MCF7-924R cells to parental MCF7 (only present the members with fold change  $>1$ ).

### **Supplemental Figure 3**

Subconfluent cell cultures of MCF-7 and MCF-7R4 cells were harvested, lysed and subjected to western blotting with indicated antibodies as described in the Methods section.
